# Supplementary material for: Affordable, flexible, and modular: a guide to open-source membrane-based water treatment systems
Source: Royal Society of Chemistry journal article supplement (doi:10.1039/c6ew00194g), 2016-01-01
Supplement: c6ew00194g1.pdf [file c6ew00194g1.pdf]

# Affordable, Flexible, and Modular: A Guide to Open-Source Membrane-Based Water Treatment Systems

Adam Slade, David Jassby\*

*Department of Chemical and Environmental Engineering, University of California – Riverside, Riverside,  
CA 92521, USA*

*\*Corresponding author email: [djassby@engr.ucr.edu](mailto:djassby@engr.ucr.edu)*

## Appendix A

### Arduino Code

The following is the Arduino sketch code in its entirety. It can be modified to accept additional commands, such as LCD display, as necessary. The contents are to be saved in a plain-text *\*.ino* file and uploaded onto the Arduino hardware using the Arduino IDE.

#### A.1 Constants

```
// constants - for tuning  
unsigned long dtmax = 1000000; // [us] - max sample collection time  
unsigned long cutoff = 4294967295 - dtmax; // [us] - cutoff time  
word smax = 500; // maximum number of samples to collect  
  
// autonomous shutdown  
unsigned long lastContact = 0; // [ms] - the last contact time
```

```
unsigned long timeout = 10000; // [ms] - max no-contact time
```

## A.2 Setup

```
// arduino controller setup (runs once)
```

```
void setup()
```

```
{
```

```
    Serial.begin(500000); // 500 kbps baud rate
```

```
    delay(1000); // wait for communication
```

```
    SerialWrite(1,2,3); // report connection to PC
```

```
}
```

## A.3 Loop

```
// arduino controller infinite loop (runs indefinitely)
```

```
void loop()
```

```
{
```

```
    // check for command
```

```
    if (Serial.available() >= 4){
```

```
        byte DataIn[] = { 0, 0, 0, 0 }; // {command, pin, data, checksum}
```

```
        Serial.readBytes(DataIn, 4);
```

```
        if (isValid(DataIn) == true){
```

```
            word result = DoWork(DataIn); // get result
```

```
            SerialWrite(DataIn[0],DataIn[1],result); // send result
```

```
        }
```

```
    else{
```

```

        Serial.flush(); // clear corrupted data
    }

    lastContact = millis(); // record last PC communication
}

else{

    // check for timeout

    if((millis()-lastContact)>timeout){

        //shutdown everything

        for(int i=0;i<54;i++){

            digitalWrite(i,LOW);

        }

    }

    else{

        delay(1); // wait for command

    }

}

}

```

#### A.4 Checksum

```

// generate and compare the checksum for incoming data

boolean isValid(byte DataIn[]){

    if (DataIn[3] == byte(ceil((255.0 + DataIn[0] + DataIn[1] + DataIn[2]) / 4.0))){

        return true;

    }

}

```

```

    }
    else{
        return false;
    }
}

// generate the checksum for outgoing data
byte getChecksum(byte a, byte b, byte c, byte d){
    return byte(ceil((255.0 + a + b + c + d) / 5.0));
}

```

## A.5 Write Data

```

// add checksum and write data to port
void SerialWrite(byte command, byte pin, word val){

    // initialize output
    byte DataOut[] = { 0, 0, 0, 0, 0 }; // {command, pin, data, data, checksum}

    // assign values
    DataOut[0] = command;
    DataOut[1] = pin;

    // convert word to two bytes
    byte* w = (byte*)&val;
    DataOut[2] = w[0];
}

```

```

DataOut[3] = w[1];

// add checksum
DataOut[4] = getChecksum(DataOut[0], DataOut[1], DataOut[2], DataOut[3]);

// write to serial port
Serial.write(DataOut, 5);
}

```

## A.6 Execute Command

```

// manipulate pins, based on input
word DoWork(byte DataIn[]){

// data holders
byte pin = DataIn[1];
byte data = DataIn[2];
long sum = 0;

// execute command
switch (DataIn[0]){
case 1: // digital read
    if (digitalRead(pin) == HIGH){
        return 1;
    }
    else{
        return 0;
    }
}
}

```

```

    }
    break;
case 2: // digital write
    if (data == 1){
        digitalWrite(pin, HIGH);
        return 1;
    }
    else{
        digitalWrite(pin, LOW);
        return 0;
    }
    break;
case 3: // analog read
    for (int i = 0; i < data; i++){
        sum += analogRead(pin);
    }
    return word(float(sum) / float(data));
    break;
case 4: // analog write (digital PWM)
    analogWrite(pin, data);
    return data;
    break;
case 5: // pin mode
    switch (data){
        case 1: // digital read
            pinMode(pin, INPUT);

```

```

        return 1;
        break;
    case 2: // digital write
        pinMode(pin, OUTPUT);
        return 0;
        break;
    default:
        // do nothing
        return 0;
        break;
    }
}
case 6: // pulse frequency
    return getPulsesPerSecond(pin);
    break;
}
}

```

## A.7 Pulse Frequency

// return the pulse frequency for the selected pin

```
word getPulsesPerSecond(byte pin){
```

```
    // wait for overflow to occur, if pending
```

```
    while (micros() > cutoff){
```

```
        delay(1); // wait for overflow
```

```
    }
```

```

// initialize counters

word sum = 0; // detected signal changes

byte value = digitalRead(pin); // current value

byte last = value; // previous value

// timers

float elapsed;

unsigned long start = micros();

unsigned long maxmicros = start + dtmax; // max time to record samples

// count signal changes

while (true){

    // check for change

    value = digitalRead(pin);

    if (value != last){

        sum++;

        last = value;

    }

    // check for time

    if (micros()>=maxmicros){

        break;

    }
}

```



```
        // check for samples
        if (sum >= smax){
            break;
        }

    }

    // get elapsed time
    elapsed = float(micros() - start) / 1000000.0;

    // convert to frequency (pps)
    float freq = (float(sum) / float(elapsed)) / 2.0;
    return word(freq);
}
```
